# A Bayesian framework for the detection of diffusive heterogeneity

Julie A. Cass <sup>1\*</sup>, C. David Williams <sup>1</sup>, Julie Theriot<sup>1,2</sup>,

<sup>1</sup> Allen Institute for Cell Science, Seattle, WA, USA

<sup>2</sup> Department of Biology, University of Washington, Seattle, WA, USA

\* [juliec@alleninstitute.org](mailto:juliec@alleninstitute.org)

## Abstract

Cells are crowded and spatially heterogeneous, complicating the transport of organelles, proteins and other substrates. One aspect of this complex physical environment, the mobility of passively transported substrates, can be quantitatively characterized by the diffusion coefficient: a descriptor of how rapidly substrates will diffuse in the cell, dependent on their size and effective local viscosity. The spatial dependence of diffusivity is challenging to quantitatively characterize, because temporally and spatially finite observations offer limited information about a spatially varying stochastic process. We present a Bayesian framework that estimates diffusion coefficients from single particle trajectories, and predicts our ability to distinguish differences in diffusion coefficient estimates, conditional on how much they differ and the amount of data collected. This framework is packaged into a public software repository, including a tutorial Jupyter notebook demonstrating implementation of our method for diffusivity estimation, analysis of sources of uncertainty estimation, and visualization of all results. This estimation and uncertainty analysis allows our framework to be used as a guide in experimental design of diffusivity assays.

## Introduction

Diffusion is essential for the intra-cellular transport of many organelles, proteins and substrates. In the crowded and heterogeneous physical environment of the cell, diffusivity is a local, spatially dependent characteristic of the space, dependent on factors such as the size of the particle, and the local viscosity and spatial crowding. These spatial heterogeneities must be addressed when using diffusion coefficients as readouts of intra-cellular transport and the physical environment. This intra-cellular diffusion coefficient is often experimentally estimated through two approaches: single particle tracking (SPT) [1–3] and fluorescence correlation spectroscopy (FCS) [4].

In single particle tracking experiments, a live cell is imaged in successive frames, and individual punctate objects are tracked to construct a trajectory of time-dependent positions (Fig 1). One of the most common approaches to extracting diffusion coefficient estimates from SPT is to use mean-squared displacement (MSD). The MSD generically follows the following relationship:

$$MSD(\tau) = \langle (\Delta x(\tau))^2 \rangle = 2dD\tau^\alpha, \quad (1)$$

where  $\Delta x$  is the step size between frames taken at a time lag of  $\tau$ , in  $d$  spatial dimensions, and  $D$  is the diffusion coefficient. The parameter setting the MSD scaling with time,  $\alpha$ , is determined by the diffusive model. Any temporal scaling with  $\alpha \neq 1$  is called anomalous diffusion, with super- and sub-diffusion models having  $\alpha > 1$  and  $\alpha < 1$ , respectively. Intracellular diffusion has most often been characterized to be sub-diffusive, likely as a result of crowding [3].

**Fig 1. Single particle tracking.** In SPT, a live cell is imaged over a series of time points. Individual punctate objects are localized at each time-step, and these positions are traced from frame to frame to produce individual time-lapse trajectories.

For objects undergoing homogeneous isotropic diffusion, the MSD of puncta is a linear function of lag time ( $\alpha = 1$ ), with the slope being proportional to the apparent diffusion coefficient: The averaging in this calculation can be taken on a single or multiple trajectory basis (i.e. mean of each displacement over time-step  $\tau$  in a single trajectory or over many trajectories). If MSD analysis is completed on a per-trajectory basis, this technique allows for spatial resolution of diffusivity variation; however it

relies on the fitting of the  $MSD(\tau)$  slope. This analysis can be misleading, as it includes no information about the uncertainty in this estimation beyond calculation of the error on the mean. As a result, when multiple single-trajectory MSD's are plotted together on a log-log plot, it can be easy to interpret non-overlapping  $MSD(\tau)$  line as portraying distinct diffusivities, when they could just be representing uncertainty-driven variations around a single shared value.

In FCS, a laser illuminates a region of a sample containing fluorescently tagged particles [5]. The characteristic time a fluorescent particle spends in the illuminated region ("dwell time") can be calculated from the intensity auto-correlation function. Together with the length scale of the illuminated region, dwell time gives an estimate of the diffusion coefficient in this region. The calculation of the diffusion coefficient from these properties is dependent on the chosen diffusion model; this method is flexible to anomalous diffusion models and captures small-scale local diffusivities. However, only one local measurement can be made from each illuminated region, making the assessment of many local regions experimentally intensive.

Like FCS, SPT can be used to probe local diffusivities and is robust to anomalous diffusion models [6]. But in contrast, rather than providing one diffusivity measurement per illuminated region, SPT allows for as many individual local diffusivity estimates to be simultaneously made as there are fluorescent particles in the field of view. Dependent on particle density, this advantage allows for the efficient use of spatially dependent diffusivity assays. While SPT offers many advantages, it relies on finite observations of a stochastic assay, limiting our diffusivity estimation accuracy.

While powerful analyses from SPT have indicated the complexity of transport in live cells, the spatial variation of the diffusion coefficient remains poorly characterized. This can be attributed to challenges in disentangling effects of biological heterogeneity and limited sampling of a stochastic process [7,8]. To address these challenges, we developed a Bayesian framework to estimate a posterior distribution of the possible diffusion coefficients underlying single-trajectory dynamics. This framework generates look-up tables predicting the detectability of differences in diffusion coefficients, conditional on the ratio of their values and amount of trajectory data collected.

Other packages with information theoretic frameworks for trajectory analysis have been released; for example, the Single-Molecule Analysis by Unsupervised Gibbs

sampling (“SMAUG”) software package [9] also uses Bayesian estimation to characterize  
diffusive environments. However, our package is unique because it is intended  
specifically to provide lightweight trajectory analysis and prediction that can be used by  
those with a biological background to inform microscopy experiment design, without  
requiring deep statistical or computational knowledge.

## Materials and Methods

### Trajectory simulation and localization error

We generated sample trajectories with known diffusion coefficients by simulating  
Brownian motion of particles in a  $d$ -dimensional space. At each time-point and along  
each spatial dimension, a step size was drawn from a zero-mean Gaussian  $\mathcal{N}(\mu = 0, \sigma^2)$   
with variance  $\sigma^2$  defined by the diffusion coefficient:  $\sigma^2 = \langle |\Delta x|^2 \rangle = 2dD\Delta t$ , where  $d$  is  
the number of spatial dimensions,  $D$  is the homogeneous isotropic diffusion coefficient,  
and  $\Delta t$  is the time-step. At each time point, a new step size in each dimension was  
drawn from the normal distribution, to generate the displacement vector  $\vec{\Delta x}$ . This  
displacement vector was added to the position  $\vec{x}(t)$  to generate the next position  
 $\vec{x}(t + \Delta t)$ . We recorded the position of the particle at each frame in a time-series,  
constructing a trajectory mimicking the data one would get from tracking an object  
from time-series images (Fig 2).

To mimic the static localization error inherent in microscopy-generated trajectories  
in our simulated trajectories, we added Gaussian error to the locations of simulated  
particles at each time point [10]. After each successive location was stochastically  
chosen based on a model of Brownian motion, an additional draw from another normal  
distribution was made to select a shift in position in each spatial dimension. The  
variance of this Gaussian localization error can be tuned to the user’s own specific  
microscope configuration.

The locations of the simulated particle at each time-point (with and without error  
included) are stored in a DataFrame, and these trajectories are digested into  
frame-to-frame displacements; realistically these step sizes were *used* to generate the  
trajectories, making back-calculating them seem tedious. However, the remainder of our

**Fig 2. Sample trajectory with and without localization error.** A 2D diffusive trajectory with no localization error is drawn for  $T$  time-steps. At each time-step, a cloud of Gaussian uncertainty is drawn; the shape and shading of this cloud demonstrate how likely it is for the position of be measured at any of the surrounding points rather than in the true position. A sample alternative trajectory is drawn (purple) showing the path we might observe the particle to take, due to the localization error in measuring the true position as a function of time.

toolkit is designed for analysis of any trajectory - simulated or tracked from images. 88  
Therefore a user can choose to either input their own image-derived trajectories or use a 89  
simulated trajectory to perform estimation of the unknown diffusivity. 90

## Bayesian inference of diffusivity 91

To estimate the diffusivity underlying a single trajectory (and our uncertainty in this 92  
estimation), we employ Bayesian inference. This method is focused on generating a 93  
“posterior probability distribution”: the probability that a random variable takes on any 94  
of a set of values, based on provided evidence and a prior distribution. In our case, the 95  
random variable is the diffusivity, and the evidence is the set of step sizes from a single 96  
trajectory. The prior distribution for the variance of a normal distribution with known 97  
mean is an inverse-gamma distribution. This acts as a conjugate prior; that is, a class of 98  
distributions for which the prior and posterior distributions take on the same 99  
mathematical form; therefor our posterior will also be an inverse-gamma function. The 100  
inverse-gamma distribution’s probability density function over diffusion coefficients 101  
 $D > 0$  is parameterized by the shape ( $\alpha$ ) and scale ( $\beta$ ): 102

$$IG(D; \alpha, \beta) = \frac{\beta^\alpha}{\Gamma(\alpha)} (1/D)^{(\alpha+1)} e^{-\beta/D}. \quad (2)$$

The posterior distribution peaks near the true diffusion coefficient and has a width 103  
corresponding to the confidence interval of our estimate, which is largely determined by 104  
the trajectory length and magnitude of localization error. 105

## Characterizing the distinguishability of diffusivity posteriors 106

To characterize our uncertainty on whether trajectories come from regions with different 107  
diffusivities, we require a way to quantitatively discriminate between pairs of posterior 108

distributions. To achieve this, we use the Kullback-Leibler (KL) divergence. The KL divergence acts as a single-value estimation of how well we can analytically distinguish whether the step sizes from a trajectory came from the diffusivity predicted by one posterior or the other. The KL divergence of two inverse-gamma distributions  $p(\alpha, \beta)$  and  $q(\hat{\alpha}, \hat{\beta})$  is calculated as follows [11]:

$$KL(\alpha, \beta, \hat{\alpha}, \hat{\beta}) = (\alpha - \hat{\alpha})\Psi(\alpha) + \hat{\beta}\left(\frac{\alpha}{\beta}\right) - \alpha + \log\frac{\beta^{\hat{\alpha}+1}\Gamma(\hat{\alpha})}{\beta\hat{\beta}^{\hat{\alpha}}\Gamma(\alpha)} \quad (3)$$

where  $\Psi(\alpha)$  is the digamma function, defined as the logarithmic derivative of the gamma function ( $\Gamma(\alpha)$ ). Since this metric is not symmetric and we have no preference between distributions  $p$  and  $q$ , we use a symmetrized version of the KL divergence  $KL = \frac{1}{2}\left(KL(\alpha, \beta, \hat{\alpha}, \hat{\beta}) + KL(\hat{\alpha}, \hat{\beta}, \alpha, \beta)\right)$ .

## Code availability

A repository for our source code is publicly available at the Allen Cell Modeling GitHub page [https://github.com/AllenCellModeling/diffusive\\_distinguishability](https://github.com/AllenCellModeling/diffusive_distinguishability), conveniently packaged with ReadTheDocs documentation and a tutorial Jupyter notebook demonstrating usage and reproducible figure production. This package is registered under DOI 10.5281/zenodo.2662552.

## Results and Discussion

### Bayesian inference of diffusivity

When the position of a diffusing object is recorded as a trajectory of discrete steps in time, the sizes of those steps can be mathematically represented as stochastic draws from a distribution characterized by the diffusion coefficient. Our method for estimating the diffusion coefficient relies on breaking individual trajectories into frame-to-frame steps, and applying a Bayesian statistical framework to predict the diffusivity underlying each set of stochastically derived step sizes. From a single trajectory, this framework provides not only an estimation of the diffusivity, but also a representation of our uncertainty. While our framework could be adapted to analyze more complex dynamic models, our current implementation introduces a workflow for analyzing

isotropic homogeneous diffusion; therefore, trajectories with unknown diffusivity will  
result in a step-size distribution which is normally distributed, with zero mean and  
unknown variance  $\mathcal{N}(\mu = 0, \sigma^2)$ .

Bayesian inference is built on the use prior and posterior distributions. Our “prior”  
distribution is an initial guess at the solution to a problem before using our observations  
or data to inform our expectations (i.e. *a priori*); for instance, if I have no intuition for  
the solution to my estimation problem, I would use a flat prior telling my model that I  
think any solution is equally likely. We then use our data to narrow down our solution  
estimation (i.e. *a posteriori*), resulting in a “posterior” distribution. In our case, the  
step size distribution from a single trajectory would be the observations, and the  
posterior might look like a distribution of diffusivity values, peaked around some value  
indicating a likely estimate of the underlying diffusion coefficient. The longer the  
trajectory is, the more information we can use to narrow down our answer, leading to a  
more tightly peaked posterior (discussed in greater detail in the *Sources of posterior  
estimate error*).

## Inverse-gamma distribution as diffusivity conjugate prior

In this section, we will step through the process of applying Bayesian analysis to our  
particular case. First, we will get introduced to the governing principle of this approach,  
called Bayes’ theorem, then we will carefully digest this principle into pieces and see  
how it applies to our own application.

Bayes’ theorem tells us that the posterior distribution for an unknown variable  $\theta$  is  
proportional to the product of the prior distribution  $p(\theta)$  and the “likelihood function”,  
or the function giving the probability of making observation  $x$  given the unknown  
variable  $p(\theta|x)$ . Mathematically, this is often represented:

$$p(\theta|x) \propto p(\theta)p(x|\theta). \quad (4)$$

How does this apply to the diffusion process we have been exploring? In our  
problem, we have taken single particle trajectories and split them into frame-to-frame  
step sizes. We can say, then, that our Bayesian “observed variable  $x$ ” is the step size  
 $\Delta x$ . We’ve discussed previously that we expect the step sizes for diffusive trajectories to

be normally distributed, with a mean of zero and an unknown variance. Translating  
again to the Bayesian framework, we can say that our unknown variable  $\theta$  is the  
variance  $\sigma^2$ , and our likelihood function is the normal distribution of step sizes, i.e.  
 $p(x|\theta) = p(\Delta x|\sigma^2) = \mathcal{N}(0, \sigma^2)$ .

The prior is our initial guess of the probability distribution of values for our unknown  
variable,  $\sigma^2$ . To determine the prior distribution for our cases,  $p(\theta) = p(\sigma^2)$ , we consider  
the mathematical dependence of the normally distributed step sizes on the variance  $\sigma^2$ :

$$p(\Delta x|\sigma^2) \propto (1/\sigma^2)^a e^{-b/\sigma^2} \quad (5)$$

We see that this dependence looks a bit like a gamma distribution, except that our  
variable of interest is found in the denominator. This class of function is intuitively  
called an inverse-gamma function (*IG*, Eq. 2). We can now say *a priori* that we expect  
our estimated  $\sigma^2$  values to follow an inverse-gamma distribution, and therefore this is  
the form of our prior:  $p(\theta) = p(\sigma^2) = IG(\sigma^2)$ .

We have now seen how to place the observed and unknown Bayesian variables in the  
context of our problem, and explored the Normal and inverse gamma distributions  
which can be used as our likelihood and prior distributions, respectively. With these  
pieces in hand, we can now find the class of function for our posterior distribution, as  
the product of our prior and likelihood distributions (Eq 4). In our case, we find that  
the product of  $p(\sigma^2)$  and  $p(\Delta x|\sigma^2)$  also has an inverse gamma dependence on  $\sigma^2$ . We  
note that our posterior distribution is a function of the same class as the posterior - we  
will come back to this after a brief note.

In this section we have built up a framework for performing Bayesian analysis to  
estimate a distribution of variances, but we promised an estimation of the diffusion  
coefficient. Now let us recall that the variance of the diffusive step size distribution is  
directly proportional to the diffusion coefficient ( $\sigma^2 = 2dD\Delta t$ ), and therefore, with the  
inclusion of a multiplicative constant, this analysis is easily transferred into a Bayesian  
estimation of diffusivity  $D$ , with inverse gamma prior and posterior distributions  $IG(D)$ .

In general, when the prior and posterior for Bayesian analysis take the same  
mathematical form, the prior is referred to as a “conjugate prior.” The matching of the  
conjugate prior and posterior function types simplifies the statistical method, presenting



one advantage of this prior. A second advantage of our prior is that the inverse-gamma 192  
distribution acts a conservative initial “guess,” with any order of magnitude diffusivity 193  
is equally likely, before the introduction of any data. The distribution and quantity of 194  
values in our set of step sizes will determine the scale ( $\alpha$ ) and shape ( $\beta$ ) parameters for 195  
our posterior inverse-gamma distribution  $IG(D; \alpha, \beta)$ . 196

## Sources of posterior estimate error 197

The estimation of diffusivity from a single trajectory is limited by the finite trajectory 198  
length and accuracy in localizing the object at each time point. As a result, careful 199  
consideration of how each of these factors will impact the estimation uncertainty is 200  
necessary when constructing an experimental design. To address this, we have 201  
constructed a framework for generating look-up tables predicting the percent error 202  
posterior diffusivity estimation conditional on a set of trajectory lengths and 203  
localization errors. 204

Many methods for estimating diffusivity from a single trajectory rely on the analysis 205  
of the frame-to-frame step-size distribution extracted from that trajectory. However, 206  
during a microscopy experiment, there will always be an inherent limitation to the 207  
degree of accuracy that an object can be localized in each frame. This arises from both 208  
static and dynamic sources of localization error; static localization error occurs due to 209  
the inherent limit to spatial resolution of imaging experiments, while dynamic 210  
localization error comes from the non-instantaneous nature of capturing an image 211  
resulting in object movement during image acquisition [12]. Since dynamic localization 212  
error is most relevant for quickly moving objects, such as small substrates, we have 213  
chosen to simulate and provide example analysis of the effects of static localization error. 214

As a result of limitations in spatial resolution, when the object is tracked and 215  
trajectories generated, an inherent limitation in localization accuracy is encoded in the 216  
trajectory, and therefore skews the step-size values being used to infer the diffusion 217  
coefficient. To demonstrate the impact of localization error on SPT, we provide an 218  
example simulated trajectory with varying amounts of localization error applied (Fig 3). 219

Figure 4 demonstrates the impact of underlying diffusion coefficients and localization 220  
errors on posterior estimates. We provide examples of trajectories in two regions with 221

**Fig 3. Sample trajectory with and without localization error.** A 2D diffusive trajectory with no localization error is drawn for  $T$  time-steps. That same trajectory is then redrawn in increasingly light colors, for increasing levels of localization error. This error is parameterized in the form of the standard deviation of a Gaussian blur, in microns. This example allows us to visualize the impact that a range of localization errors would have on the same trajectory.

differing diffusion coefficients, each with and without localization error included in the trajectory simulation. We then plot the posteriors for all four of these trajectories on one set of axes. Our tool aims to quantify the effects of this localization error on the estimation of diffusivity by generating trajectories with varying known degrees of localization error and reporting their impact on the error of the posterior estimation of the known underlying diffusivity.

**Fig 4. Sample trajectories and diffusivity posteriors, with and without localization error.** Left: Sample simulated 2D trajectories composed of 100 steps with diffusion coefficient  $D1 = 0.01 \mu\text{m}^2/\text{s}$  and  $D2 = 0.02 \mu\text{m}^2/\text{s}$ . The “Observed” trajectories are generated with localization error  $0.05 \mu\text{m}$ , while the “True” trajectories have no localization error. Right: Posterior distributions for all trajectories. These posteriors are all inverse-gamma distributions generated using our Bayesian inference framework.

Diffusive trajectories are composed of successive steps, whose sizes are stochastic draws from a distribution set by the diffusivity. When only short trajectories are available, we have only a limited set of draws from this distribution - as a result, the variance of this distribution is difficult to accurately predict, and the posterior distribution of diffusivity probabilities will be less accurate and precise. While it would be ideal to simply collect longer trajectories, this is often experimentally impossible; therefore, we aim to give experimentalists an analysis framework to estimate how accurately they can predict diffusivity given their own limitations in tracking.

Because our trajectories are simulated, we benefit from the knowledge of the true diffusivity and degree of localization error, and can therefore precisely quantify the relation between the error in our Bayesian estimation of diffusivity and the level of localization error. This provides a look-up table for experimentalists to predict the accuracy in diffusivity estimation that can be achieved with their own particular microscopy experiment, shown in Figure 4. We quantify the error in our estimates as the magnitude of the percent error between the true diffusivity and the mode of the posterior probability distribution as calculated by the posterior’s scale and shape

parameters: 244

$$\%_{error} = |100\left(\frac{\beta + 1}{\alpha} - D_{true}\right)/D_{true}|. \quad (6) \quad 245$$

Of course, due to the stochastic nature of diffusive properties, even with all the same 245  
simulation parameters, the posterior error will vary from one simulation to the next. In 246  
order to capture the mean effect of each parameter on posterior error, the results in Fig 247  
5 represent the average percent error for  $N = 10^4$  replicates of the same simulation 248  
parameterization. 249

**Fig 5. Percent posterior estimation error conditional on static localization accuracy and trajectory lengths.** The percent error for a given posterior is measured as the percent error between the true diffusion coefficient used to generate the trajectory, and the mode of the posterior distribution (or the diffusion coefficient which gives the maximum value of the probability density function). This heatmap reports the mean percent error for  $10^4$  posteriors generated under each set of trajectory length and localization error conditions, with diffusion coefficients of (A)  $0.1 \mu\text{m}^2/\text{s}$  and (B)  $0.01 \mu\text{m}^2/\text{s}$ . Please note the difference in heatmap scale bars.

In addition, it should be noted that the number of spatial dimensions of the assay 250  
(i.e. whether trajectories are measured in two or three spatial dimensions) as well as the 251  
mean-squared displacement (related to the diffusion coefficient) can impact the 252  
relationship between localization error and Bayesian estimation error. For a more 253  
in-depth discussion and simulation of this, please see the tutorial Jupyter notebook in 254  
our project GitHub repository. 255

## Distinguishability of trajectory diffusivities 256

With the above percent error analysis derived for simulated trajectories with known 257  
diffusivities, a picture arises of how our estimates of the diffusivity differ from the true 258  
values. As a result, when this technique is applied to experimentally-derived trajectories 259  
whose underlying diffusivities are unknown, we may want to ask ‘how likely is it that 260  
two trajectories resulting in different diffusivity estimates were actually derived from 261  
regions with the same diffusivity?’ The biological motivation and analog for this 262  
technical question is ‘how heterogeneous is the physical cellular environment?’ 263

This will depend on the amount of overlap between the two diffusivity posterior 264  
distributions, which is determined by: (1) how different the underlying diffusion 265  
coefficients are (how far apart the theoretical maxima of posteriors are) and (2) how 266

uncertain we are in our estimations (how wide the posterior distributions are). One way  
to measure the difference between two distributions is to use the Kullback-Leibler  
divergence (KL divergence). A KL divergence of zero indicates that two distributions  
are identical; one interpretation of this metric is that its inverse tells you the number of  
times you can draw samples from one distribution in place of the other before there is  
significant information loss.

In order to communicate the distinguishability of pairs of posteriors conditional on  
their trajectory parameters, we have created a heatmap look-up table of the KL  
divergence of posterior pairs, dependent upon the ratio of their underlying diffusion  
coefficients (i.e.  $D_2/D_1$ ), and the trajectory length. An example of this look-up table  
heatmap is provided in Figure 6. The complete code used to generate this map is  
provided in the tutorial Jupyter notebook found in the GitHub repository for this  
project. By cloning the repository, users can directly edit this example code to recreate  
this map with a different localization error or different distribution of trajectory lengths  
and diffusion coefficient values. An experimentalist may generate their own heatmap for  
trajectories with their specified degree of localization error, and get a table to tell them  
how distinguishable differences in diffusion coefficients will be for different lengths of  
trajectories that they can collect. This framework could therefore play a valuable role in  
describing the feasibility of and requirements for experiments addressing the spatial  
heterogeneity of the intra-cellular diffusive environment.

**Fig 6. Look-up table for posterior KL divergence, conditional on diffusivities and trajectory lengths.** Heatmap displaying the average KL divergence of diffusivity posteriors. For each entry in the heatmap, two trajectories of the same length (x-axis) are produced, with differing underlying diffusivities with the ratio  $D_2/D_1$  (y-axis). A posterior is estimated for each, and their KL divergence is calculated as a measure of the distinguishability of the underlying diffusivities. As this process is stochastic, this is repeated  $10^4$ , with the average being the value reported in the heatmap.

## Comparison with MSD analysis

Given a single trajectory, let us compare what we could learn of the underlying  
diffusivity through MSD analysis and our Bayesian framework. In MSD analysis, the  
trajectory would be split into step sizes associated with every possible lag time (that is,  
the mean of the squared displacement for all step sizes between frames  $\tau = 1, 2, 3...$

frames apart. The diffusivity can be calculated by fitting the MSD using Eq 1, often  
using a loglog plot. This provides a single prediction of the average diffusivity over the  
course of the trajectory. In contrast, our Bayesian framework outputs a probability  
distribution of diffusivity values; the diffusivity giving the highest probability can be  
extracted to give a single-values diffusivity estimation, but the distribution as a whole  
offers the appealing advantage of giving a quantitative measure of our confidence in this  
estimate.

This confidence interval offers an added benefits over MSD analysis. Through  
posterior visualization and the KL divergence analysis described in the previous section,  
this Bayesian estimation framework provides us with a straightforward visual and  
quantitative way to diagnose how likely it is that diffusivity estimates from two  
trajectories are actually describing regions with different physical properties. In the case  
of MSD, comparison of single-trajectory diffusivity estimates is done by plotting  
 $MSD(\tau)$  for each trajectory on the same log-log plot and comparing their intercepts.  
This methodology fails to capture information about uncertainty, and may lead to the  
false conclusion that each trajectory is taken from a region with a unique diffusivity. In  
many cases Bayesian posterior analysis will reveal significant overlap between these  
trajectories' posteriors, indicating the analyzed trajectories do not mark the region as  
having heterogeneous diffusivity.

## Application to spatially dependent diffusivity characterization

In the introduction of this paper, we discussed the importance of analysis techniques  
that acknowledge the heterogeneity of cellular environments. The single-trajectory  
dependence of this tool offers a framework to build on for characterizing variations in  
the diffusivities felt by trajectories recorded in different cellular regions. By mapping the  
diffusivity estimates from each trajectory (value most probable from posterior  
distribution) to the spatial region where the tracked substrate was localized, the user  
can build up a spatial mapping of the diffusivity. While frameworks exist for spatial  
mapping of the physical properties of cells, such as nanorheology of injected  
particles [13] and SMAUG [9], these techniques respectively require an extensive and  
invasive experimental design or in-depth knowledge of computational Bayesian inference.

Our tools offers a flexible and approachable framework for experimental design of studies to probe the spatial variation of physical properties of the cell.

## Framework limitations

As we have discussed, the presence of localization error and the finite nature of trajectories will contribute to the uncertainty in any analysis of single particle trajectories. Here, we discuss several other important limitations to be considered when using this software package.

This framework is currently only implemented for the analysis of pure diffusion, however anomalous diffusion (particularly sub-diffusion) is commonly reported in the analysis of biological trajectories. Users could adapt the package to analyze trajectories undergoing anomalous diffusion by editing our Bayesian estimation code. We have described how our conjugate prior and posterior model have been selected specifically to analyze a normal distribution of step sizes with zero mean; because the step size distribution is dependent upon the diffusion model, the class of function used for the prior and posterior will also be dependent upon the diffusion model. To modify this framework for other diffusion models, users would therefore select new prior and posterior distributions, and require a new equation for calculating the KL divergence for a pair of distributions belonging to this mathematical function class (i.e. a replacement for Eq 3).

Realistic intra-cellular transport is additionally complicated by the presence of active transport and flow. Furthermore, the affects of confinement and characterization of the physical properties of the cytoplasm (i.e. elasticity) can further complicate intra-cellular dynamics. As these factors are not considered in the current implementation of our framework, they will contribute to the error in the analysis of experimentally derived trajectories.

## Conclusion

Heterogeneity of diffusive dynamics may majorly impact the transport of essential cellular substrates but remains largely uncharacterized. To shed light on the feasibility of resolving spatial from stochastic drivers of diffusive heterogeneity in trajectory data,

we developed a framework for predicting our ability to detect differences in diffusivity 351  
under different experimental regimes. Our framework is intended to inform the design of 352  
experiments characterizing the spatial dependence of diffusivity on sub-cellular location. 353

## Acknowledgments 354

We would like to thank Steph Weber, for her helpful comments on this manuscript, and Molly Maleckar, Gabriel Mitchell and Jamie Sherman for their helpful conversations. We thank Jackson Brown for his CookieCutter template and guidance in repository initialization, and Thao Do for her scientific illustration. Finally, we thank Paul G. Allen, founder of the Allen Institute for Cell Science, for his vision, encouragement and support.

## References

1. Lee GM, Ishihara A, Jacobson K. Direct observation of brownian motion of lipids in a membrane. PNAS. 1991;88:6274–6278.
2. Saxton MJ, Jacobson K. SINGLE-PARTICLE TRACKING: Applications to Membrane Dynamics. Annu Rev Biophys Biomol Struct. 1997;26:373–399.
3. Weber SC, Spakowitz AJ, Theriot JA. Bacterial Chromosomal Loci Move Subdiffusively through a Viscoelastic Cytoplasm. PRL. 2010;104(23)(238102).
4. Magde D, Elson E, Webb WW. Thermodynamic Fluctuations in a Reacting System—Measurement by Fluorescence Correlation Spectroscopy. Phys Rev Lett. 1972;29:705–708. doi:10.1103/PhysRevLett.29.705.
5. Machán R, Hof M. Recent developments in fluorescence correlation spectroscopy for diffusion measurements in planar lipid membranes. International journal of molecular sciences. 2010;11:427–457. doi:10.3390/ijms11020427.
6. Harwardt M, Dietz MS, Heilemann M, Wohland T. SPT and Imaging FCS Provide Complementary Information on the Dynamics of Plasma Membrane Molecules. BiophysJ., 2018;.

7. Valentine MT, Kaplan PD, Thota D, Crocker JC, Gisler T, Prud'homme RK, et al. Investigating the microenvironments of inhomogeneous soft materials with multiple particle tracking. *Phys Rev E*. 2001;64(061506).
8. Lampo TJ, Stylianidou S, MP B, Wiggins P, Spakowitz AJ. Cytoplasmic RNA-Protein Particles Exhibit Non-Gaussian Subdiffusive Behavior. *BiophysJ*. 2017;112(3):532–542.
9. Karlake JD, Donarski ED, Shelby SA, Demey DM, DiRita VJ, Veatch SL, et al. SMAUG: Analyzing single-molecule tracks with nonparametric Bayesian statistics. *BioRxiv Pre-print*. 2019;doi:<http://dx.doi.org/10.1101/578567>.
10. Michalet X. Mean square displacement analysis of single-particle trajectories with localization error: Brownian motion in an isotropic medium. *Phys Rev E: Statistical, nonlinear, and soft matter physics*. 2010;82. doi:10.1103/PhysRevE.82.041914.
11. Llera A, Beckmann CF. Estimating an Inverse Gamma distribution. *arXiv:160501019 [statME]*. 2016;.
12. Savin T, Doyle P. Static and dynamic errors in particle tracking microrheology. *BiophysJ*. 2005;88:623–38. doi:10.1529/biophysj.104.042457.
13. Wu PH, Hale CM, Chen WC, Lee JS, Tseng Y, Wirtz D. High-throughput ballistic injection nanorheology to measure cell mechanics. *Nature protocols*. 2012;7:155–170. doi:10.1038/nprot.2011.436.



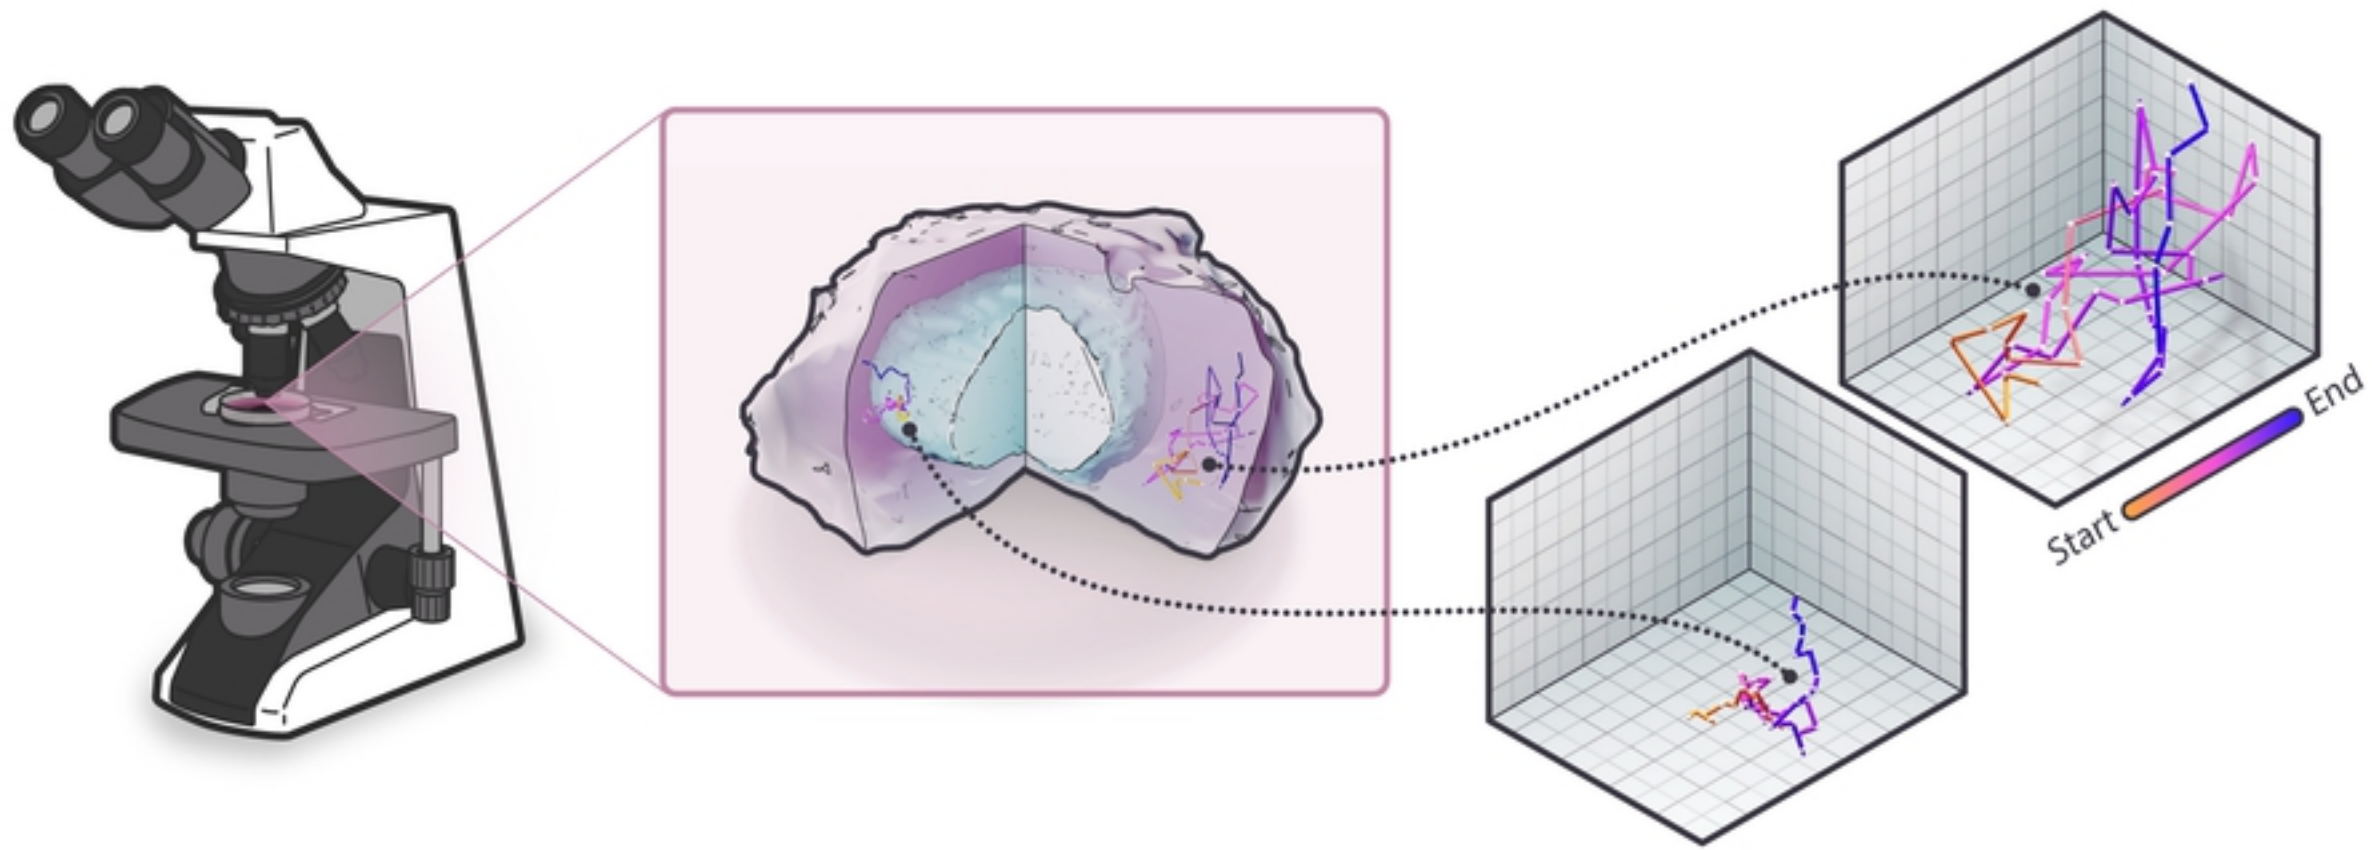

Figure 1

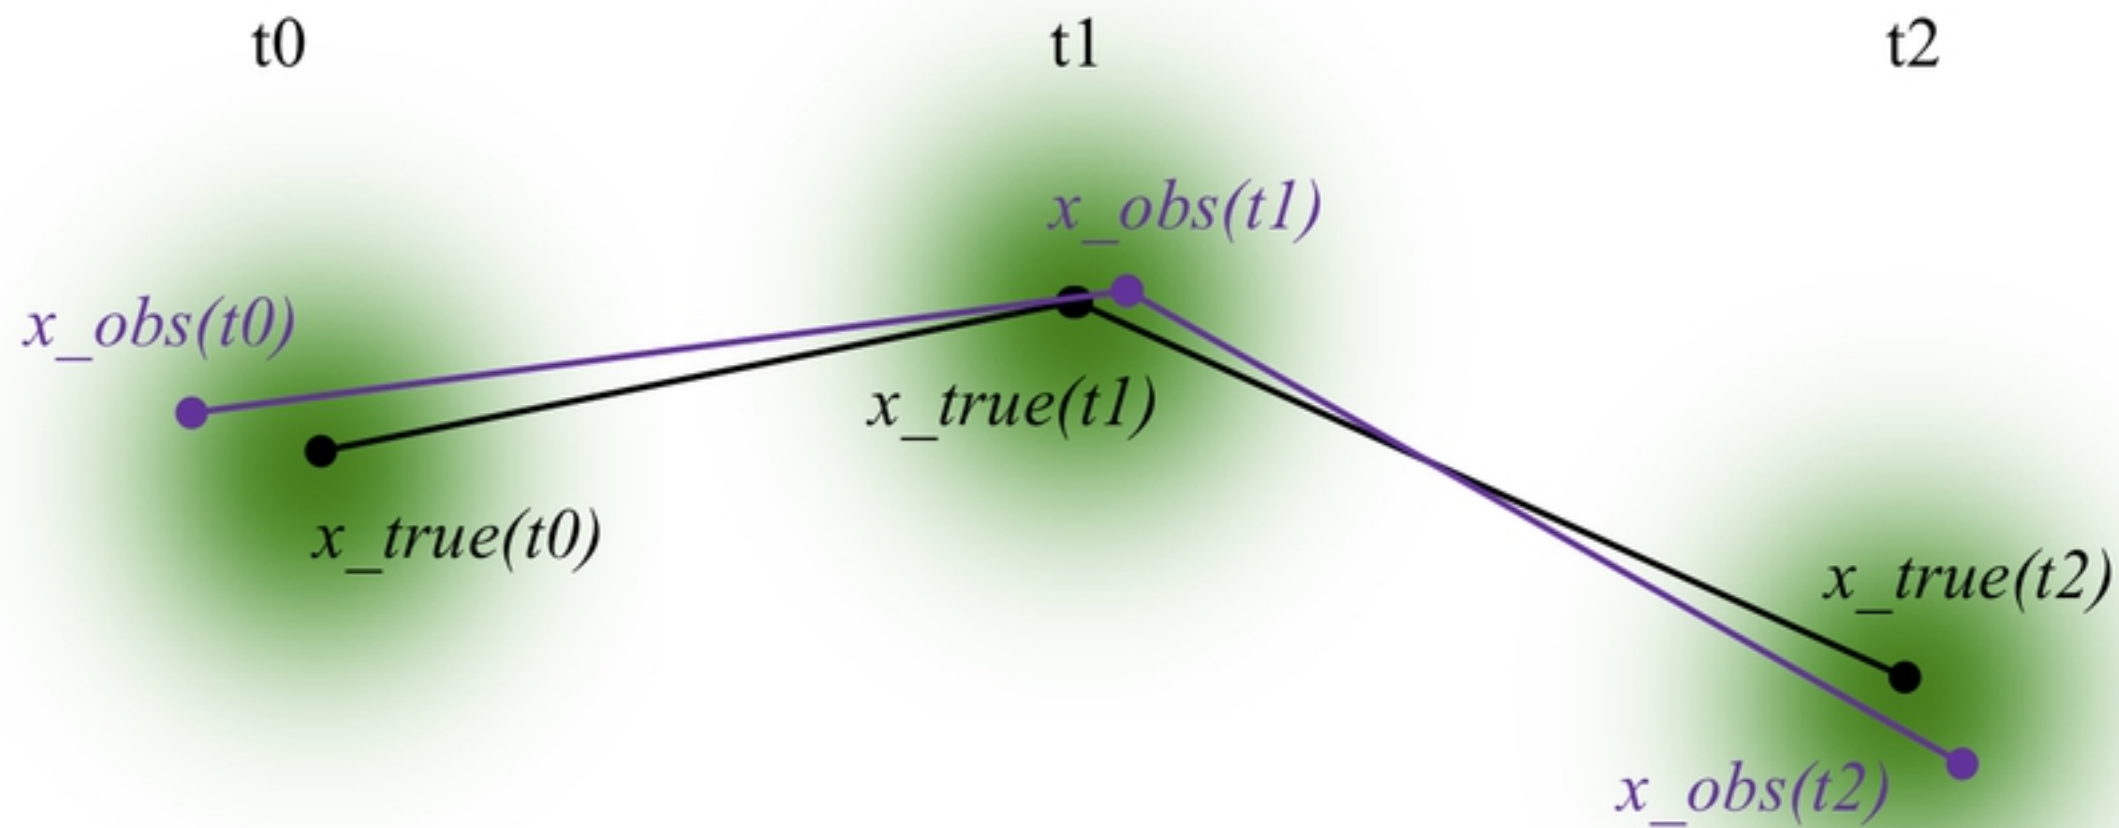

Figure 2

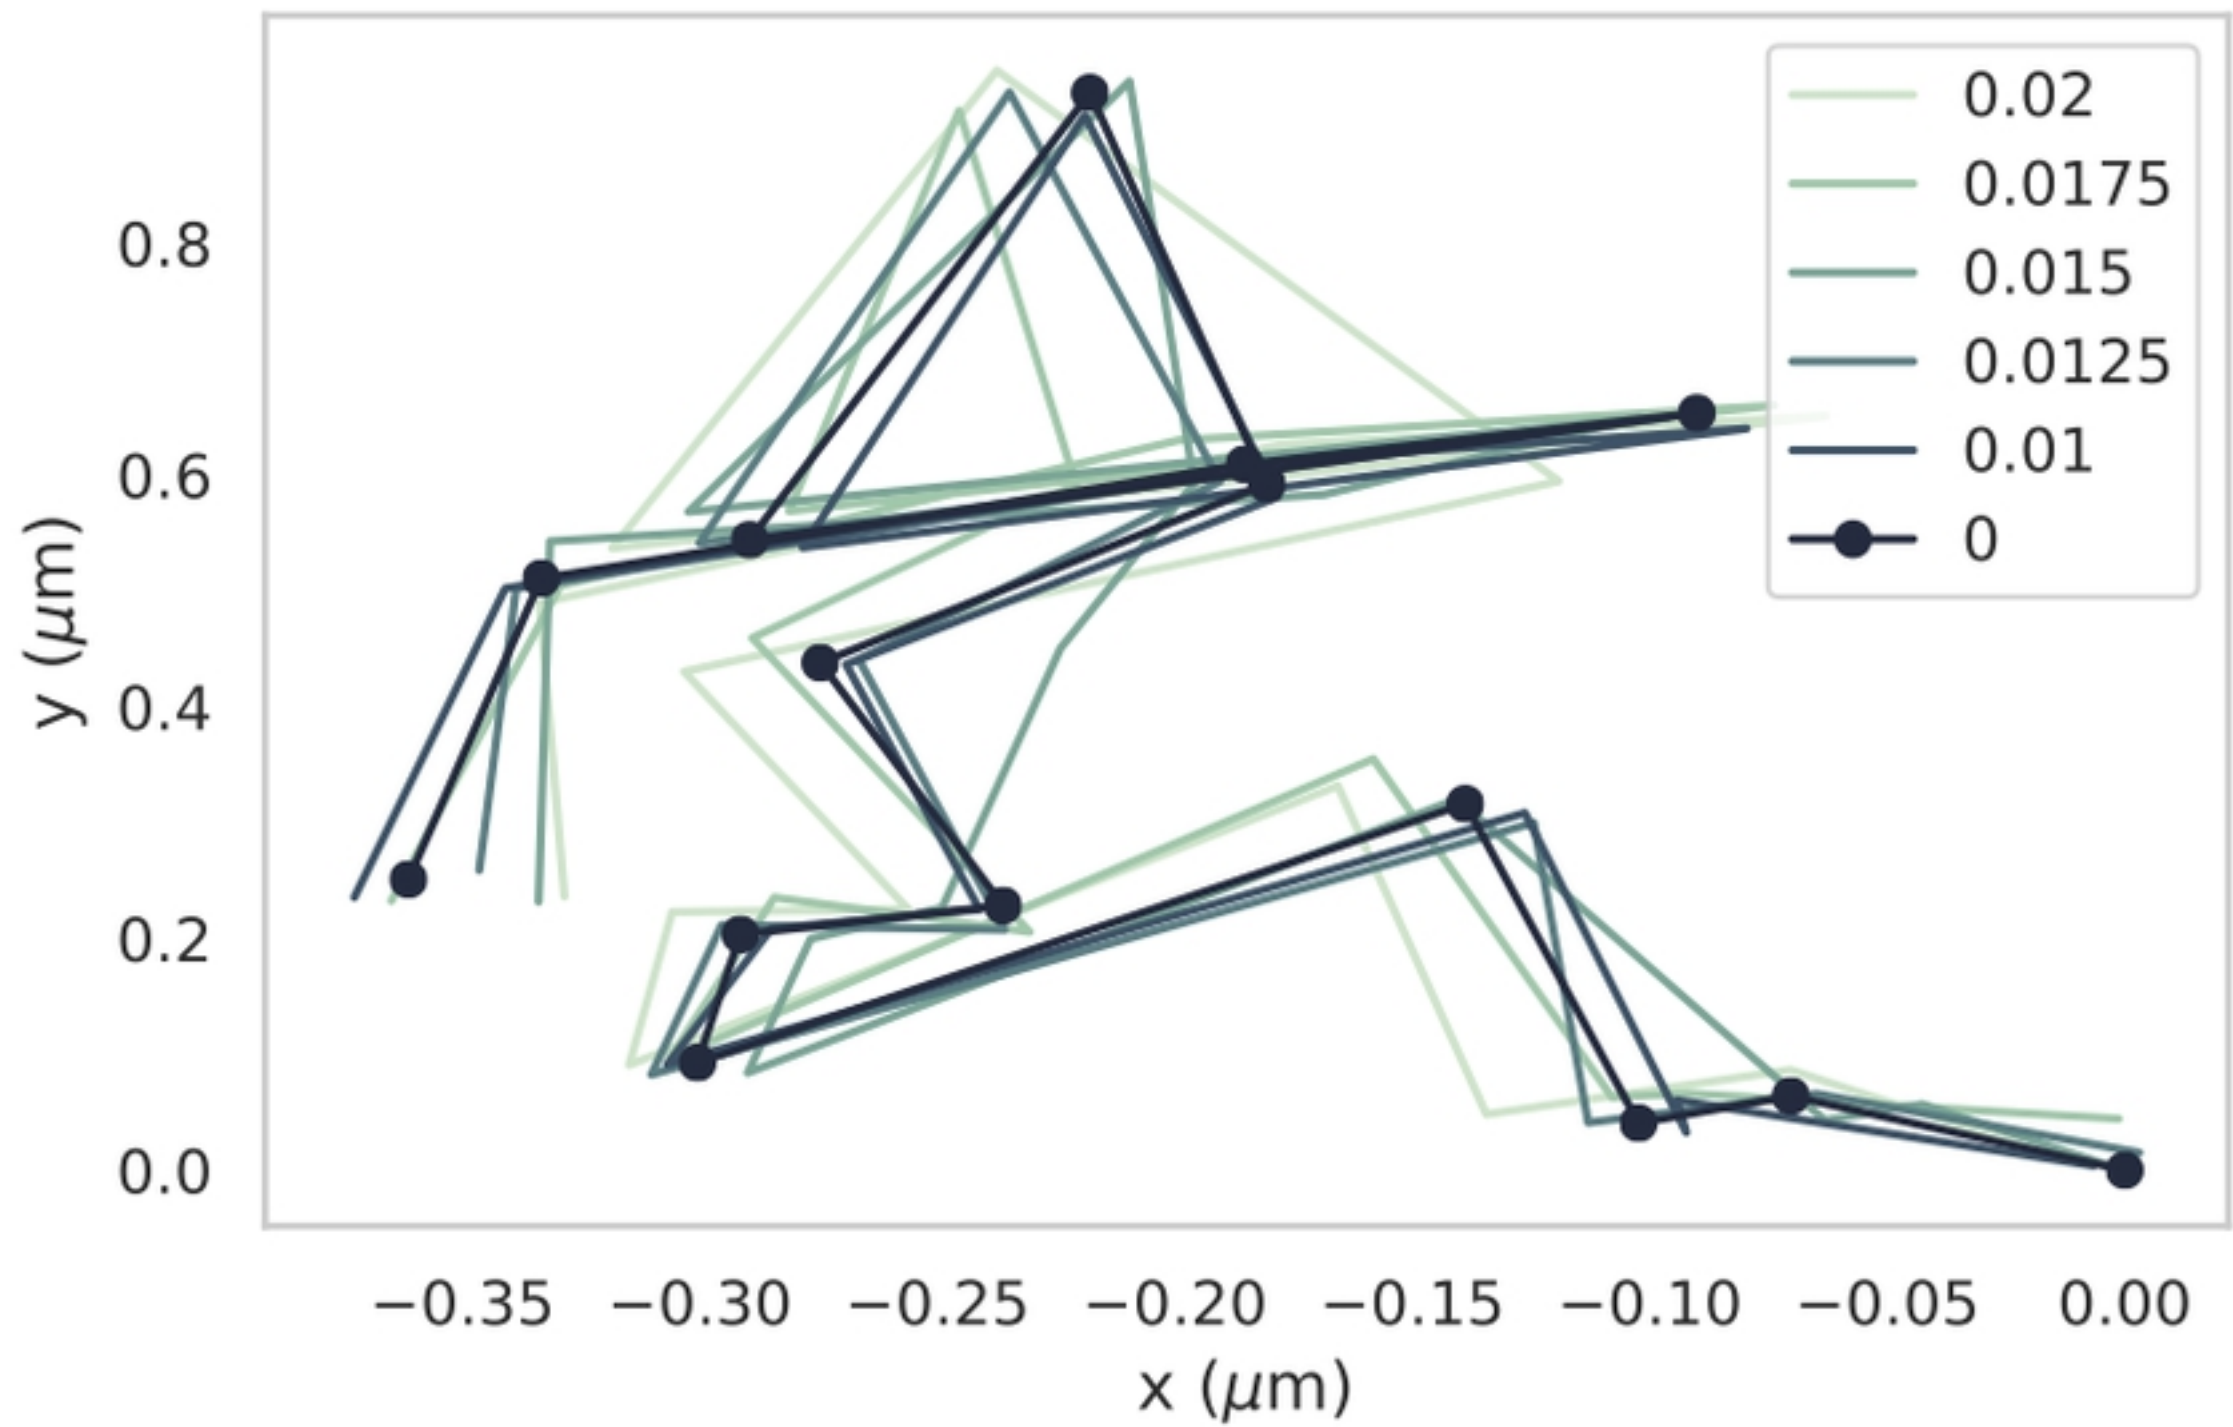

Figure 3

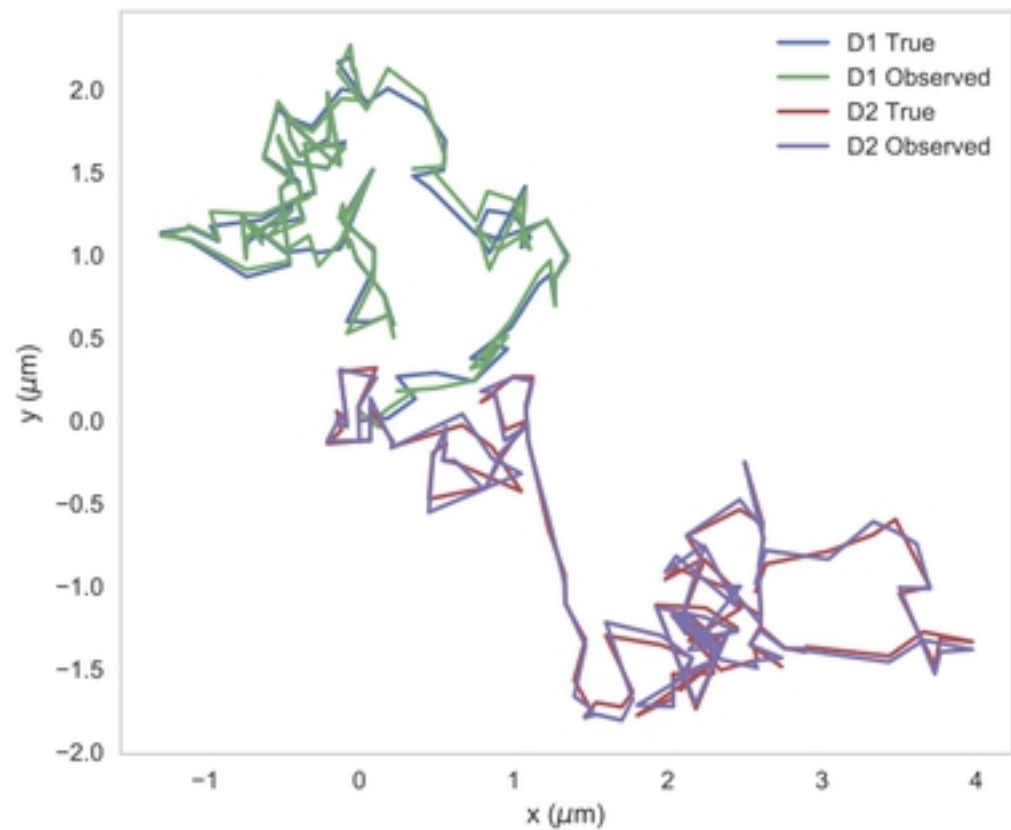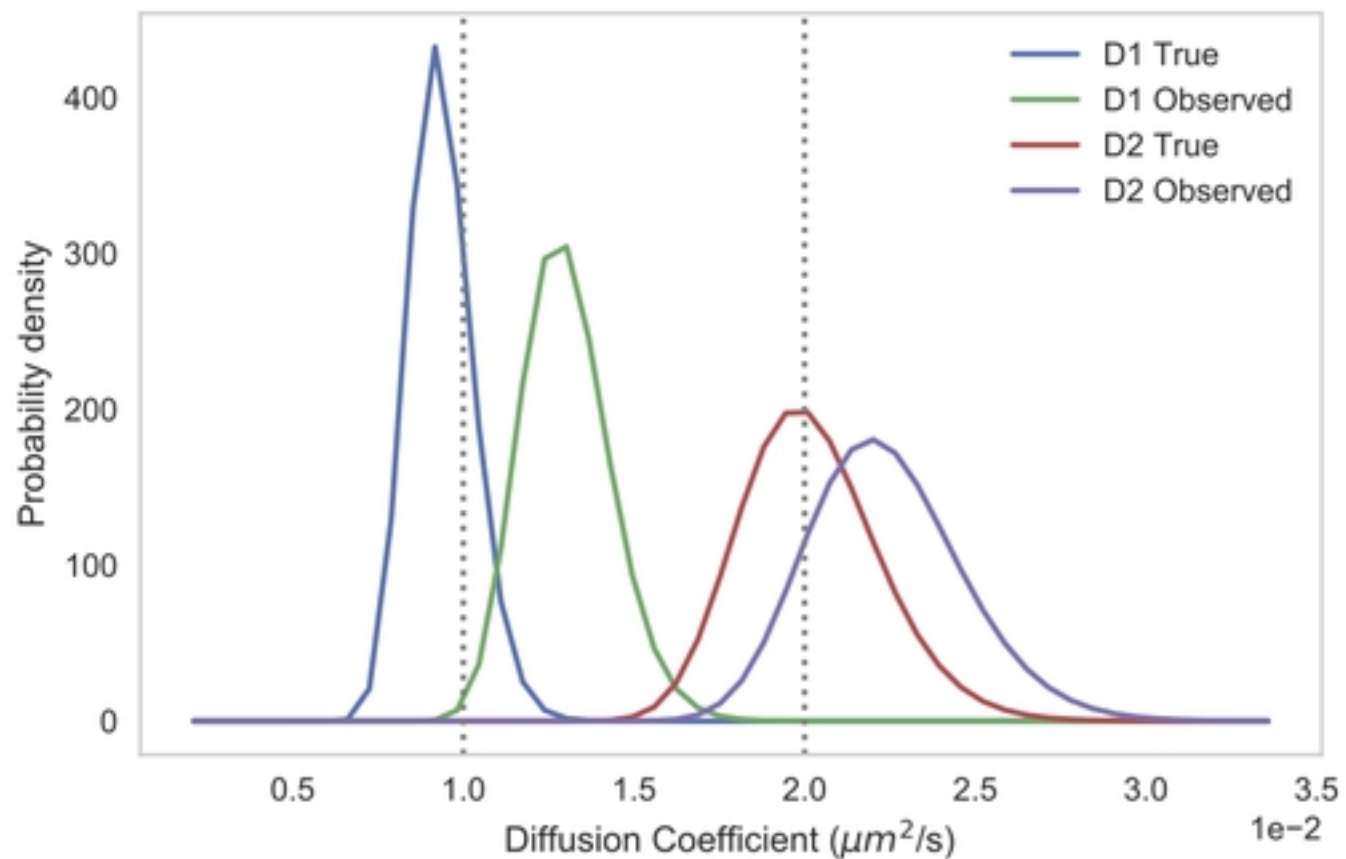

Figure 4

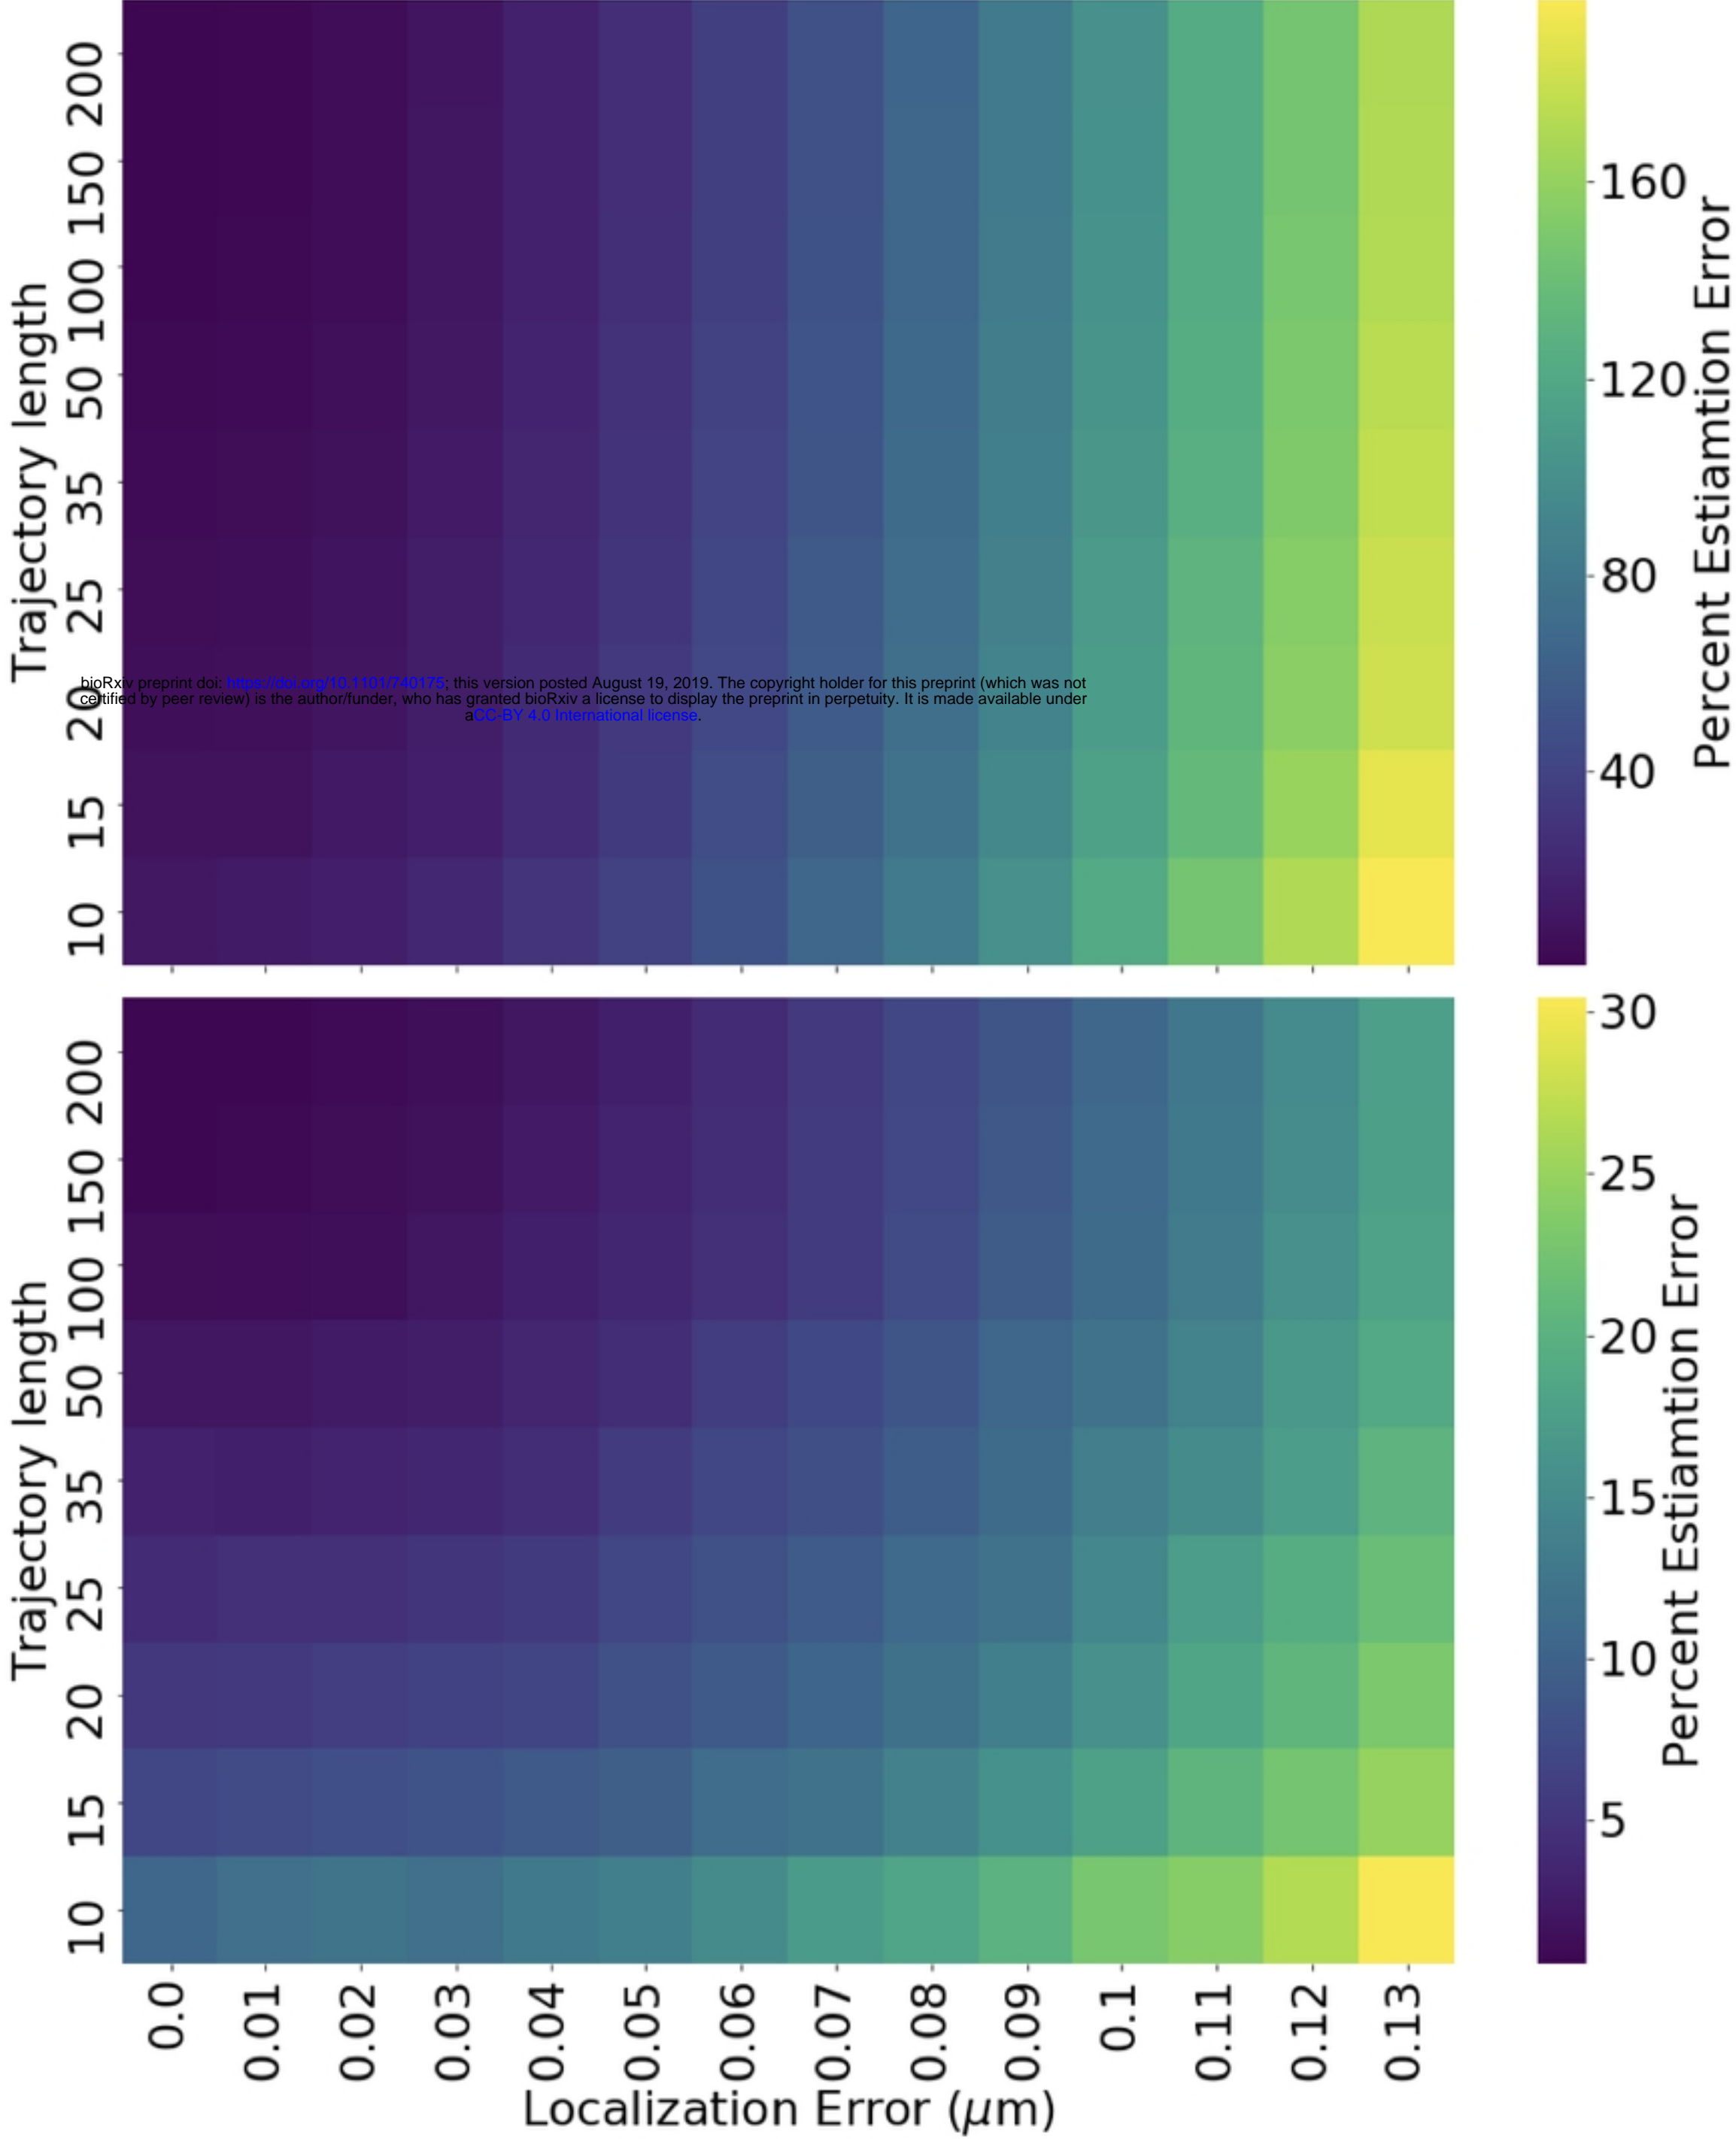

Figure 5

bioRxiv preprint doi: <https://doi.org/10.1101/740175>; this version posted August 19, 2019. The copyright holder for this preprint (which was not certified by peer review) is the author/funder, who has granted bioRxiv a license to display the preprint in perpetuity. It is made available under aCC-BY 4.0 International license.

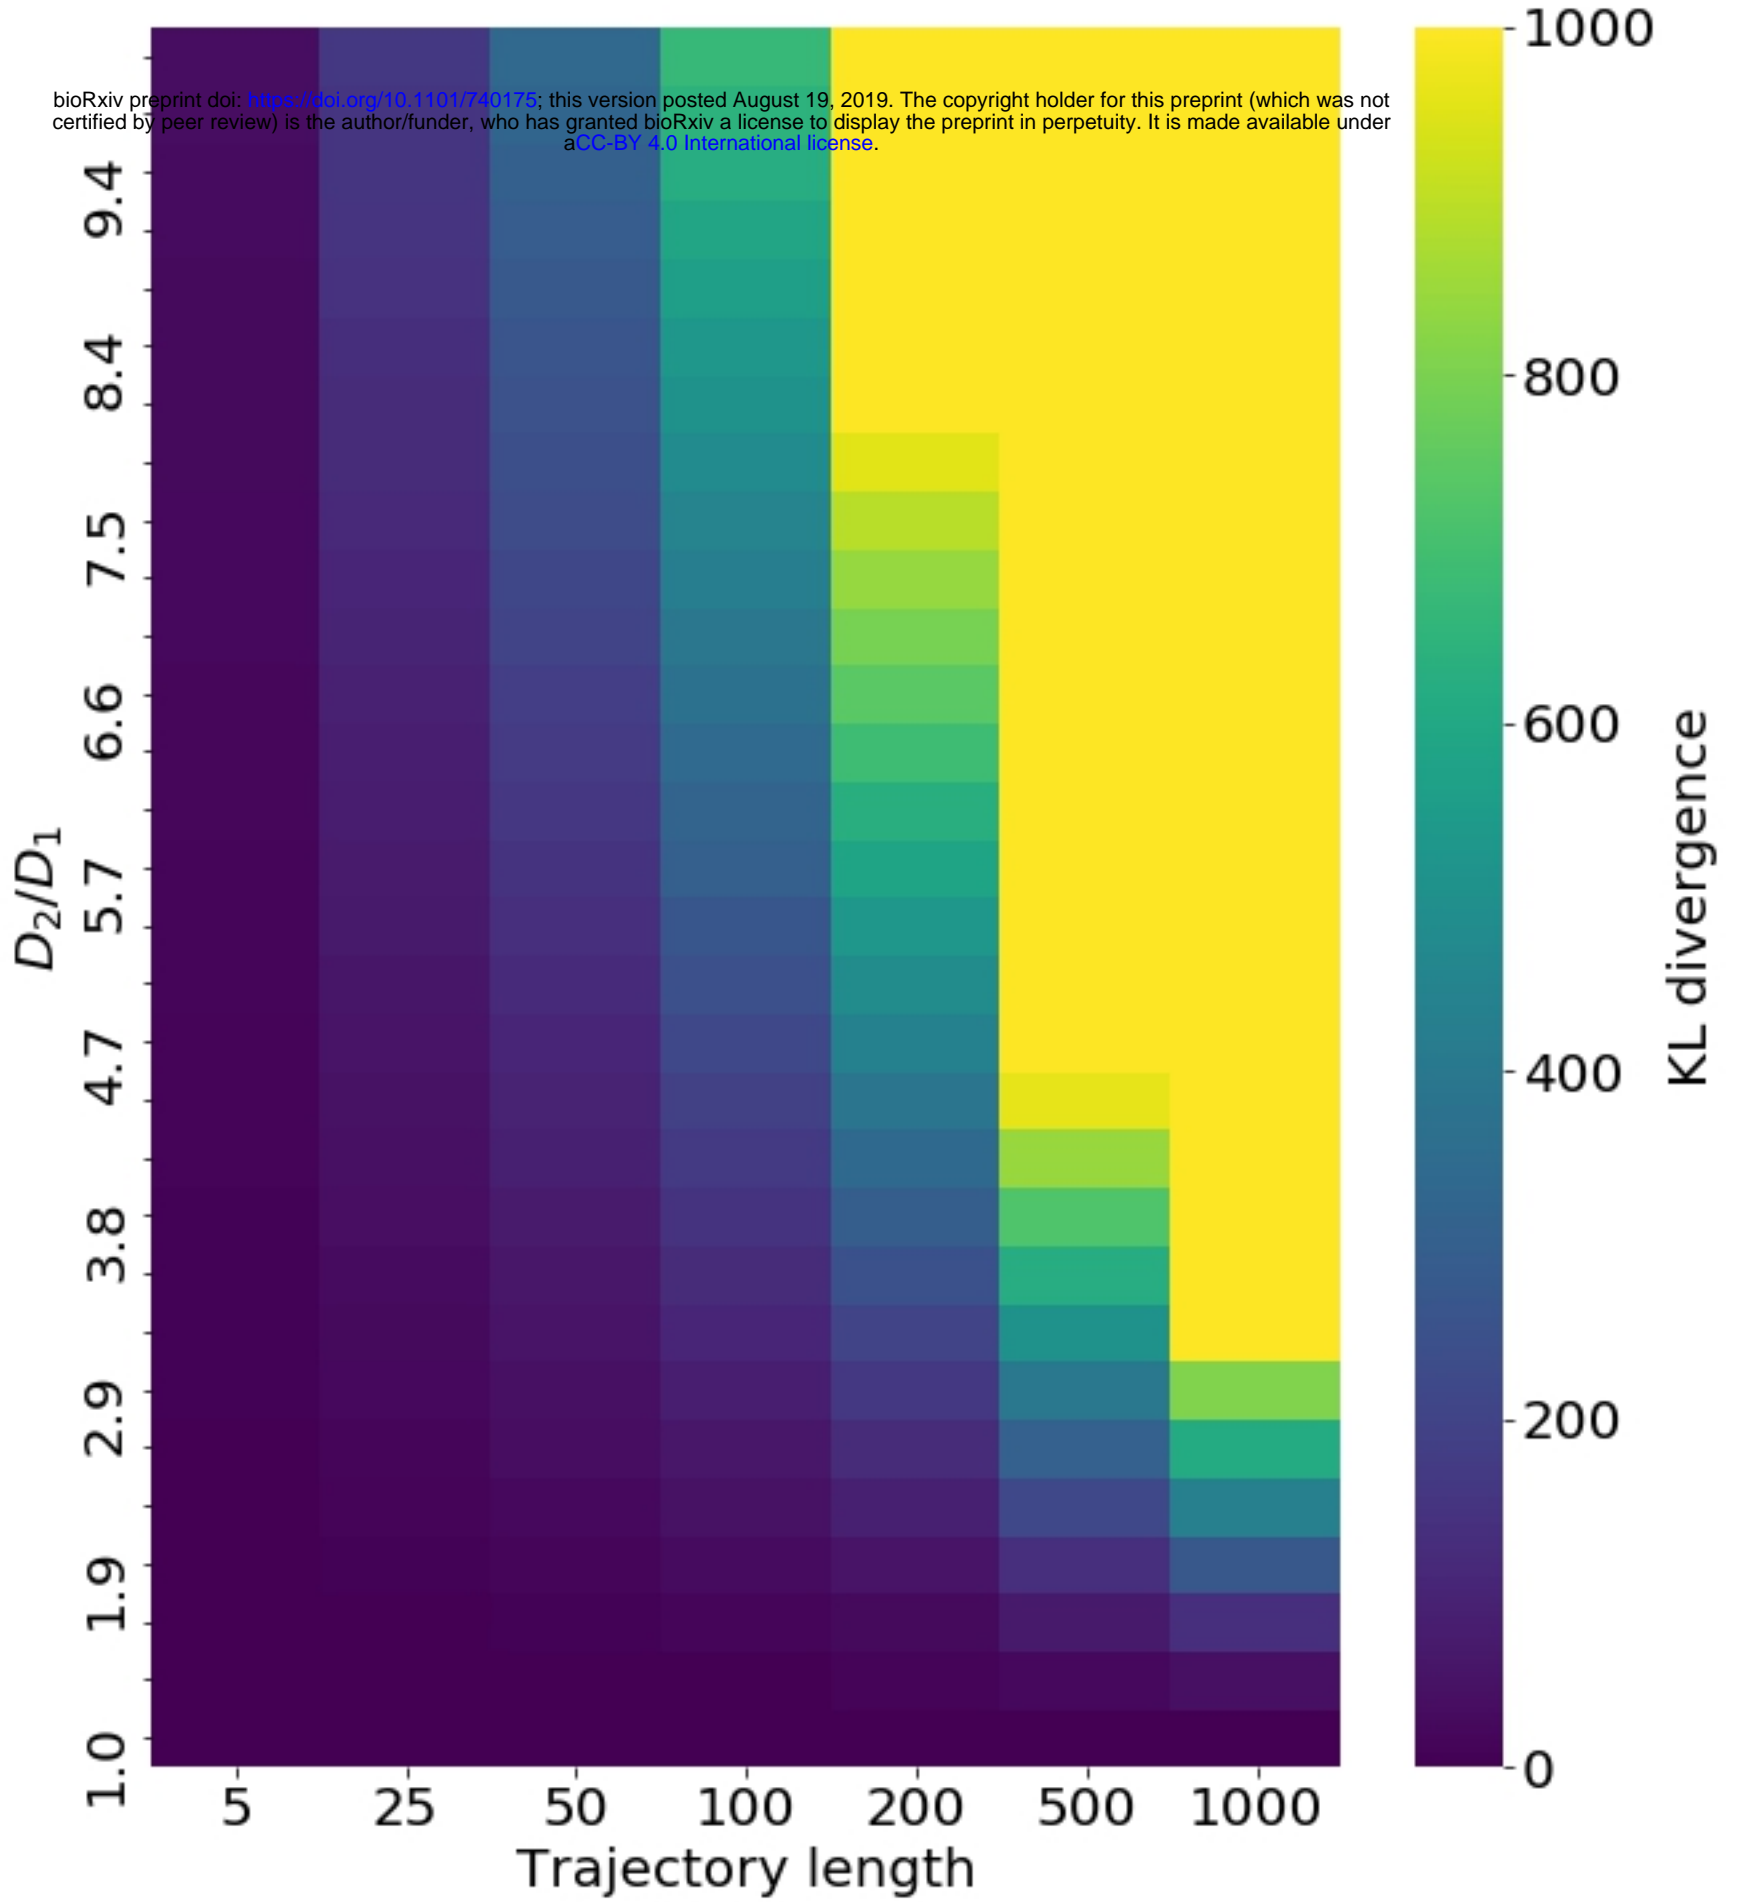

Figure 6
